# Supplementary material for: North Atlantic warming over six decades drives decreases in krill abundance with no associated range shift
Source: PubMed Central journal article supplement (PMC8166933; doi:10.1038/s42003-021-02159-1), 2021-05-31
Supplement: 42003_2021_2159_MOESM2_ESM.pdf [file 42003_2021_2159_MOESM2_ESM.pdf]

## Supplementary Information

### North Atlantic warming over six decades drives decreases in krill abundance with no associated range shift

Martin Edwards<sup>1\*</sup>, Pierre Hélaouët<sup>2</sup>, Eric Goberville<sup>3</sup>, Alistair Lindley<sup>2</sup>, Geraint Tarling<sup>4</sup>, Michael T. Burrows<sup>5</sup>, Angus Atkinson<sup>1</sup>

\*Corresponding author: [globalplankton@gmail.com](mailto:globalplankton@gmail.com)

a. Day

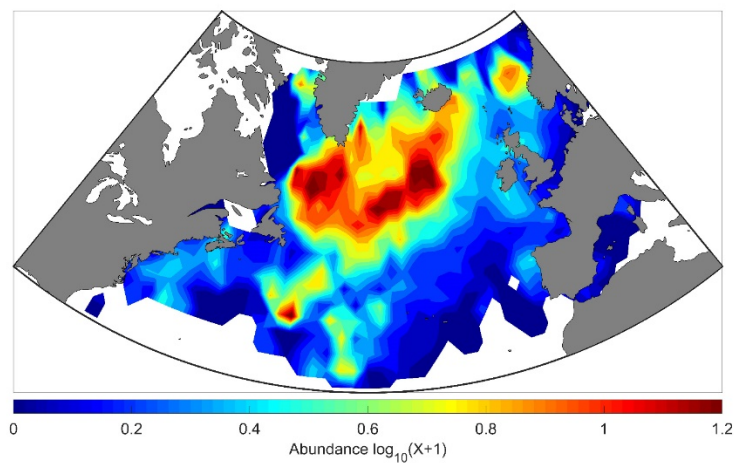

b. Night

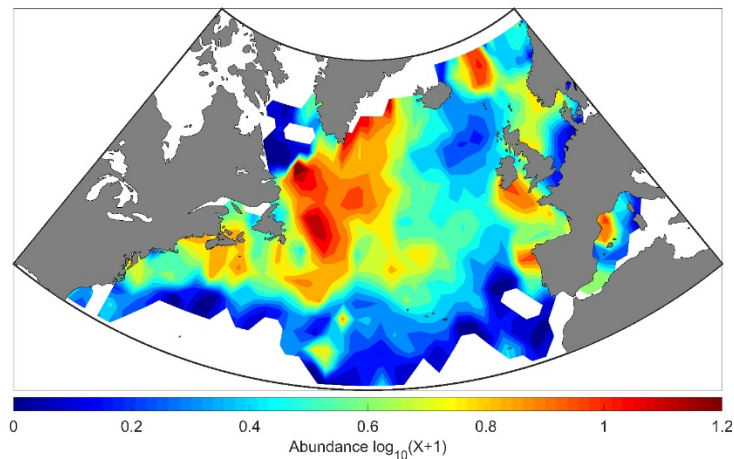

Supplementary figure 1: **Geographical distribution of euphausiids in the North Atlantic between day (a) and night samples (b).**
